# Supplementary material for: Evidence for Finely-Regulated Asynchronous Growth of Toxoplasma gondii Cysts Based on Data-Driven Model Selection
Source: PLoS Comput Biol. 2013 Nov 14;9(11):e1003283. doi: 10.1371/journal.pcbi.1003283 (PMC3828147; doi:10.1371/journal.pcbi.1003283)
Supplement: Dataset S2 — Cysts from mouse 2. (CSV) [file pcbi.1003283.s002.csv]

Diametere 1	Diameter 2
18.94	18.7
15.67	15.62
36.62	35.3
64.35	62.05
56.53	55.92
28.11	26.01
29.43	29.04
39.23	33.82
63.03	60.58
35.45	35.25
25.27	25.13
30.96	30.01
31.2	27.71
46.34	45.18
38.31	36.53
23.66	23.6
30.54	30
37.4	36.28
46.97	45.39
32.48	30.83
28.44	27.06
26.14	24.78
34.54	34.47
34.53	33.35
43.27	41.59
38.87	38.54
57.49	57.18
32.66	32.53
30.19	21.6
50.1	49.81
20.05	16.56
40.86	40.86
35.27	34.82
60.11	59.19
33.4	33.2
57.96	57.95
41.31	40.72
57.11	52.54
43.67	42.56
30.54	29.23
49.26	46.79
29.37	23.02
28.38	27.99
38.83	38.38
23.22	22.3
26.34	23.46
39.34	38.86
72.76	60.29
50.48	50.41
34.83	34.82
36.11	31.42
34.53	31.59
30.4	30.1
51.8	47.32
27.5	26.09
