# Supplementary material for: Evidence for Finely-Regulated Asynchronous Growth of Toxoplasma gondii Cysts Based on Data-Driven Model Selection
Source: PLoS Comput Biol. 2013 Nov 14;9(11):e1003283. doi: 10.1371/journal.pcbi.1003283 (PMC3828147; doi:10.1371/journal.pcbi.1003283)
Supplement: Dataset S4 — Cysts from mouse 4. (CSV) [file pcbi.1003283.s004.csv]

Diametere 1	Diameter 2
25.93	25.84
25.33	25.03
51.66	51.18
43.92	43.44
26.95	24.75
26.67	25.7
32.64	30.63
43.14	41.29
22.33	21.82
31.24	30.33
28.88	28.61
53.64	53.36
19.83	19.56
32.1	30.87
13.88	13.63
29.41	29
42.24	36.04
71.12	53.33
34.5	33.22
29.42	29.11
20.93	20.48
31.21	30.41
27.73	26.69
26.01	24.87
34.69	28.9
45.85	44.46
22.47	20.58
29.73	29.73
59.57	58.42
20.17	19.3
46.9	46.57
41.51	41.46
28.35	27.52
44.89	44.71
25.45	25.36
22.22	21.02
40.01	38.13
20.17	20.08
22.97	22.47
25.04	24.32
39.86	37.88
21.42	19.69
20.54	20.48
22.32	22.2
33.68	31.31
23.58	23.26
30.14	29.87
44.1	38.71
30.6	30.43
37.54	37
19.44	17.89
22.73	21.67
